# Supplementary material for: Associations between Total Atherosclerosis Burden of Baroreceptor-Resident Arteries and ECG Abnormalities after Acute Ischemic Stroke
Source: MDPI journal article supplement (doi:10.3390/brainsci14050505), 2024-05-16
Supplement: s1 [file s1]

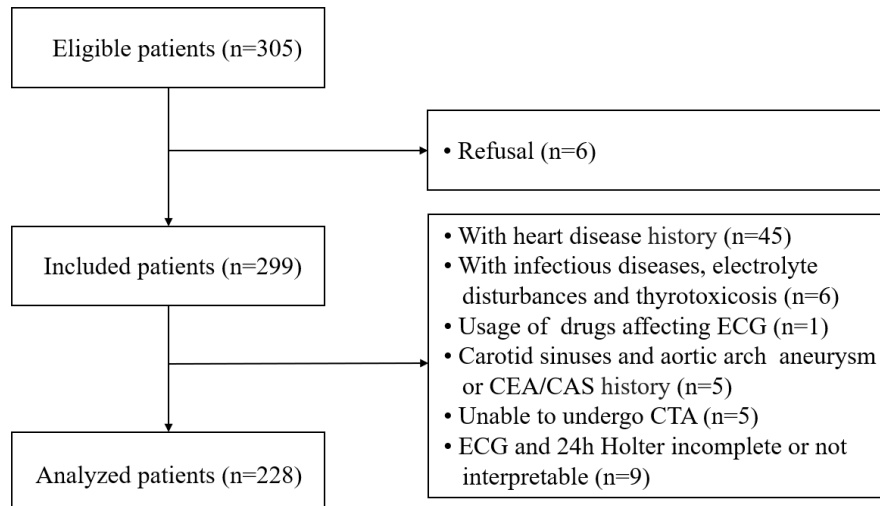

**Fig. S1** Study flow chart.

Abbreviations: ECG = electrocardiogram; CEA = carotid endarterectomy; CAS = carotid artery stenting; CTA = computed tomography angiogram.

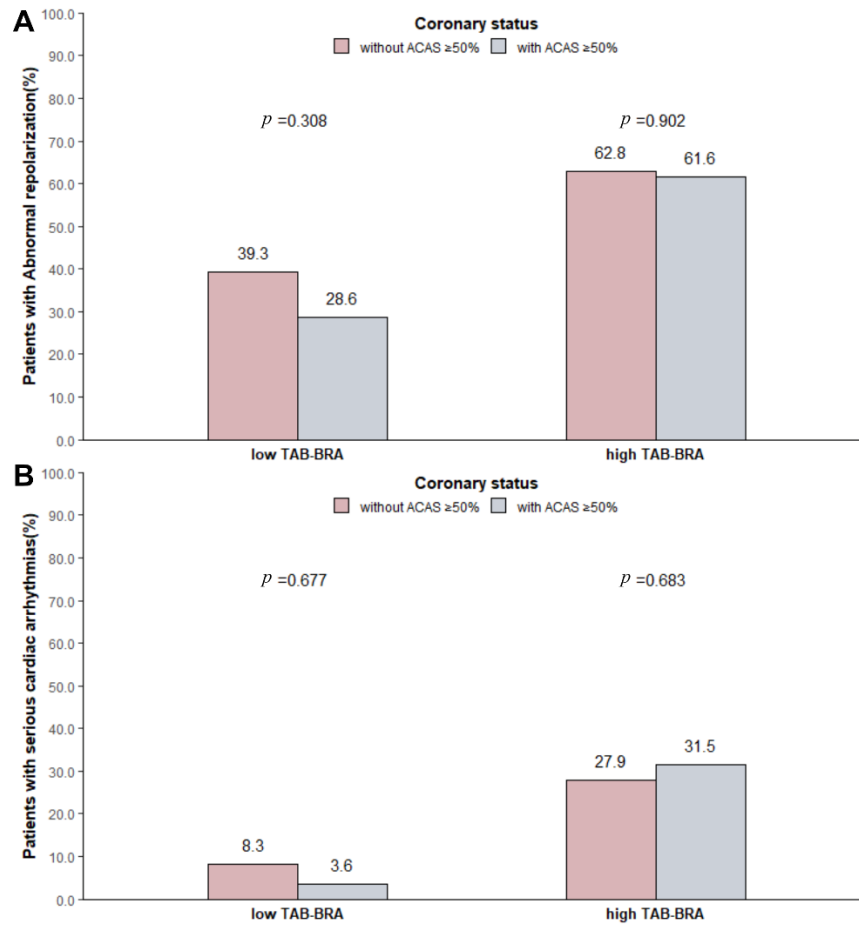

**Fig. S2** Comparisons of ECG abnormalities after acute ischemic stroke between patients with ACAS  $\geq 50\%$  and without ACAS  $\geq 50\%$  in the high TAB-BRA group and low TAB-BRA group.

Abbreviations: ACAS = asymptomatic coronary artery stenosis; SCA = serious cardiac arrhythmias.
