# Supplementary material for: Associations between Total Atherosclerosis Burden of Baroreceptor-Resident Arteries and ECG Abnormalities after Acute Ischemic Stroke
Source: MDPI journal article supplement (doi:10.3390/brainsci14050505), 2024-05-16
Supplement: s1 [file s1]

**Supplemental Table 1. Univariate logistic regression analysis for ECG abnormalities after acute ischemic stroke**

| Variable               | Crude OR (95% CI)            |                            |
|------------------------|------------------------------|----------------------------|
|                        | Abnormal repolarization      | SCA                        |
| Age, year              | <b>1.03 (1.01, 1.06) *</b>   | <b>1.09 (1.05, 1.13) *</b> |
| Sex (male)             | 0.62 (0.34, 1.12)            | 1.22 (0.56, 2.66)          |
| BMI, kg/m <sup>2</sup> | 1.02 (0.94, 1.09)            | 0.93 (0.84, 1.02)          |
| Smoking                | 0.93 (0.55, 1.57)            | 1.30 (0.67, 2.54)          |
| Hypertension           | 1.41 (0.82, 2.41)            | 1.80 (0.87, 3.73)          |
| Diabetes mellitus      | <b>1.85 (1.06, 3.21) *</b>   | 1.15 (0.58, 2.29)          |
| Prior stroke           | 1.20 (0.63, 2.28)            | 1.66 (0.77, 3.55)          |
| Initial NIHSS          | <b>1.42 (1.23, 1.65) *</b>   | <b>1.23 (1.07, 1.41) *</b> |
| Infarct Volume, mL     | 1.00 (0.99, 1.01)            | 1.00 (1.00, 1.01)          |
| Insular involvement    | <b>13.66 (3.13, 59.59) *</b> | <b>3.70 (1.52, 9.04) *</b> |
| ACAS $\geq$ 50%        | 1.23 (0.73, 2.08)            | 1.77 (0.91, 3.46)          |
| TAB-BRA, points        | <b>1.09 (1.05, 1.14) *</b>   | <b>1.12 (1.07, 1.18) *</b> |

Abbreviations: TAB-BRA = Total Atherosclerosis Burden of Baroreceptor-Resident Arteries; OR = odds ratio; CI = confidence interval; BMI = body mass index;

NIHSS = National Institutes of Health Stroke Scale; ACAS = asymptomatic coronary artery stenosis; SCA = serious cardiac arrhythmias.

\* indicate  $p < 0.05$ .

**Supplemental Table 2. Multivariable logistic analysis of associations between abnormal repolarization and serious cardiac arrhythmias**

| Indices                                        | Adjusted OR (95% CI) † | <i>p</i> value |
|------------------------------------------------|------------------------|----------------|
| Abnormal repolarization                        | 4.07 (1.58-10.44)      | 0.004          |
| Abnormal repolarization persisting over 3 days | 7.24 (2.94-17.83)      | <0.001         |

Abbreviations: OR = odds ratio; CI = confidence interval.

†ORs were adjusted for the following covariates: age, sex, body mass index, smoking, hypertension, diabetes mellitus, prior stroke, initial NIHSS, infarct Volume, insular involvement, asymptomatic coronary artery stenosis  $\geq 50\%$ .
